# Supplementary material for: MMP12 serves as an immune cell–related marker of disease status and prognosis in lung squamous cell carcinoma
Source: PeerJ. 2023 Aug 16;11:e15598. doi: 10.7717/peerj.15598 (PMC10439720; doi:10.7717/peerj.15598)
Supplement: Supplemental Information 2 [file peerj-11-15598-s002.xlsx]

## Sheet: Sheet1
Sample ID	Group	Age	Gender	MMP12 protein levels
T1	LUSC	60	M	4
T2	LUSC	53	M	4
T3	LUSC	48	M	4
T4	LUSC	74	M	4
T5	LUSC	54	M	4
T6	LUSC	50	M	4
T7	LUSC	66	M	4
T8	LUSC	54	M	4
T9	LUSC	31	F	4
T10	LUSC	50	M	4
T11	LUSC	51	M	4
T12	LUSC	65	M	4
T13	LUSC	62	M	4
T14	LUSC	44	F	4
T15	LUSC	52	M	4
T16	LUSC	50	M	4
T17	LUSC	55	M	4
T18	LUSC	51	M	4
T19	LUSC	57	M	4
T20	LUSC	19	F	4
T21	LUSC	73	M	4
T22	LUSC	62	M	4
T23	LUSC	53	M	4
T24	LUSC	45	M	4
T25	LUSC	70	M	4
T26	LUSC	51	M	4
T27	LUSC	55	M	4
T28	LUSC	67	M	8
T29	LUSC	69	M	8
T30	LUSC	60	M	8
T31	LUSC	55	M	8
T32	LUSC	53	M	8
T33	LUSC	73	M	8
T34	LUSC	57	M	8
T35	LUSC	56	M	8
T36	LUSC	74	M	8
T37	LUSC	78	M	8
T38	LUSC	73	M	8
T39	LUSC	53	M	8
T40	LUSC	54	M	8
T41	LUSC	50	M	8
T42	LUSC	58	M	8
T43	LUSC	44	M	8
T44	LUSC	46	M	8
T45	LUSC	75	F	8
T46	LUSC	66	M	8
T47	LUSC	50	M	8
T48	LUSC	74	M	8
T49	LUSC	63	M	8
T50	LUSC	62	F	8
T51	LUSC	70	M	8
T52	LUSC	67	F	8
T53	LUSC	60	M	8
T54	LUSC	69	M	8
T55	LUSC	60	M	8
T56	LUSC	56	M	8
T57	LUSC	52	M	8
T58	LUSC	43	F	8
T59	LUSC	54	M	8
T60	LUSC	11	M	8
T61	LUSC	51	F	8
T62	LUSC	50	M	8
T63	LUSC	74	M	8
T64	LUSC	62	M	8
T65	LUSC	50	M	8
T66	LUSC	51	M	12
T67	LUSC	56	M	12
T68	LUSC	69	M	12
T69	LUSC	41	M	12
T70	LUSC	56	M	12
T71	LUSC	62	M	12
T72	LUSC	60	M	12
T73	LUSC	65	M	12
T74	LUSC	49	M	12
T75	LUSC	50	F	12
T76	LUSC	54	M	12
T77	LUSC	52	M	12
T78	LUSC	77	M	12
T79	LUSC	70	M	12
T80	LUSC	74	M	12
T81	LUSC	63	M	12
T82	LUSC	72	M	12
T83	LUSC	53	M	12
T84	LUSC	51	M	12
T85	LUSC	53	M	12
T86	LUSC	60	M	12
T87	LUSC	40	F	12
T88	LUSC	51	M	12
T89	LUSC	48	M	12
T90	LUSC	76	M	12
T91	LUSC	51	M	12
T92	LUSC	56	M	12
T93	LUSC	45	M	12
T94	LUSC	59	F	12
T95	LUSC	63	M	12
T96	LUSC	60	F	12
T97	LUSC	49	M	12
T98	LUSC	69	M	12
T99	LUSC	70	M	12
T100	LUSC	20	M	12
T101	LUSC	66	M	12
T102	LUSC	50	M	12
T103	LUSC	76	M	12
T104	LUSC	77	M	12
T105	LUSC	56	M	12
T106	LUSC	58	M	12
C1	Control			0
C2	Control			0
C3	Control			0
C4	Control			0
C5	Control	45	F	0
C6	Control	56	M	0
C7	Control	19	M	0
C8	Control			2
C9	Control			2
C10	Control			2
C11	Control	53	F	2
C12	Control			4
C13	Control			4
C14	Control			4
C15	Control			4
C16	Control			4
C17	Control			4
C18	Control	60	M	4
C19	Control			8
