# Supplementary material for: MMP12 serves as an immune cell–related marker of disease status and prognosis in lung squamous cell carcinoma
Source: PeerJ. 2023 Aug 16;11:e15598. doi: 10.7717/peerj.15598 (PMC10439720; doi:10.7717/peerj.15598)
Supplement: Supplemental Information 7 [file peerj-11-15598-s007.xlsx]

## Sheet: KEGG.GPL570
ID	Description	setSize	enrichmentScore	NES	pvalue	p.adjust	qvalues	rank	leading_edge	core_enrichment
KEGG_CHEMOKINE_SIGNALING_PATHWAY	KEGG_CHEMOKINE_SIGNALING_PATHWAY	181	0.645644	2.40048	0.0016835	0.0146614	0.0110715	2629	tags=40%, list=13%, signal=35%	CCL8/CXCL11/CXCL5/CCL18/CCL4/CXCL9/CCL11/CXCL13/CXCL10/CCL7/CXCL8/CCL13/CCL26/CCR1/ITK/CCL21/PIK3CG/PPBP/CCR5/CCL5/CCL2/CXCR6/JAK2/STAT1/RAC2/FGR/NCF1/HCK/DOCK2/CXCR4/CCR2/CXCL12/GNB4/GNG2/CCL22/PRKCB/CCR7/CXCL3/CXCL16/CCR6/CCL24/ELMO1/CCR8/CXCL1/ADCY8/PREX1/CCL20/STAT2/SHC4/AKT3/CXCL6/CCL19/CCR3/GNGT2/WAS/PIK3R5/PIK3CD/CCL17/CXCR3/GNAI2/JAK3/PRKACB/ADCY7/GNG10/ADCY3/VAV1/PLCB4/GNAI3/GSK3A/PIK3R1…
KEGG_FOCAL_ADHESION	KEGG_FOCAL_ADHESION	195	0.548553	2.05674	0.00170648	0.0146614	0.0110715	2194	tags=31%, list=11%, signal=28%	COL11A1/SPP1/TNC/VEGFC/ITGA4/PIK3CG/COL5A2/THBS2/LAMC2/PDGFC/COL5A1/PAK5/COL3A1/THBS1/RAC2/FN1/LAMA1/ITGA5/CAV1/COL6A3/COL6A2/COL4A2/LAMB1/PDGFRA/COL4A1/COL1A1/PDGFRB/COL1A2/CCND2/PRKCB/LAMB3/LAMA4/ITGA6/ITGB7/COL5A3/COL6A1/IBSP/COL4A6/ITGAV/BIRC3/ITGA2/FLT1/SHC4/AKT3/PDGFA/ITGA11/CAV2/RAPGEF1/ZYX/PIK3R5/LAMC1/FYN/PIK3CD/MYL9/ACTN1/ITGB1/FLNA/FLNC/LAMA3/PARVG/ITGA3
KEGG_CYTOKINE_CYTOKINE_RECEPTOR_INTERACTION	KEGG_CYTOKINE_CYTOKINE_RECEPTOR_INTERACTION	250	0.702764	2.70831	0.00171821	0.0146614	0.0110715	2068	tags=44%, list=10%, signal=40%	CCL8/CXCL11/CXCL5/CCL18/TNFRSF17/CCL4/CXCL9/CCL11/CXCL13/IL1R2/CXCL10/CCL7/CXCL8/IL2RA/IFNG/CCL13/IL1B/CSF2RB/INHBA/TNFSF4/IL7R/IL24/CCL26/CCR1/VEGFC/TNFSF13B/CCL21/PPBP/IL21R/CCR5/IL15/CCL5/CCL2/PDGFC/CD27/CXCR6/IL10RA/IL6/IL2RB/IL22RA2/IL7/IL12RB2/TNFRSF9/IL18RAP/IL1A/CSF2RA/IL2RG/IL1RAP/OSM/TNFSF11/TNFRSF11B/TNFRSF1B/CXCR4/IL15RA/CCR2/CXCL12/CSF1R/FAS/PDGFRA/CCL22/TNFRSF12A/PDGFRB/FASLG/IL13RA…
KEGG_PATHWAYS_IN_CANCER	KEGG_PATHWAYS_IN_CANCER	318	0.418245	1.63714	0.00175131	0.0146614	0.0110715	2905	tags=27%, list=14%, signal=23%	MMP1/MMP9/CXCL8/VEGFC/CCNA1/PIK3CG/WNT2/LAMC2/EGLN3/IL6/STAT1/WNT5A/RAC2/FN1/CSF2RA/LAMA1/FGF2/SLC2A1/ETS1/COL4A2/CSF1R/LAMB1/PTGS2/FAS/PDGFRA/COL4A1/PDGFRB/FASLG/MITF/PRKCB/LAMB3/LAMA4/CDK6/ITGA6/FZD1/RALB/FGF11/FZD10/LEF1/TGFA/WNT11/MMP2/BMP2/COL4A6/TGFBR1/ITGAV/HSP90B1/FZD2/BIRC3/SPI1/STK4/TGFB2/ITGA2/BAX/TGFB3/GLI2/AKT3/PDGFA/EGLN1/PIK3R5/LAMC1/PIK3CD/ITGB1/TRAF1/LAMA3/GLI1/ITGA3/RALA/SKP2/FG…
KEGG_JAK_STAT_SIGNALING_PATHWAY	KEGG_JAK_STAT_SIGNALING_PATHWAY	152	0.593905	2.15036	0.00178891	0.0146614	0.0110715	2781	tags=36%, list=13%, signal=32%	IL2RA/IFNG/CSF2RB/IL7R/IL24/PIK3CG/IL21R/IL15/IL10RA/IL6/IL2RB/IL22RA2/JAK2/IL7/STAT1/IL12RB2/CSF2RA/IL2RG/OSM/STAT4/IL15RA/IL13RA2/SPRED1/IL13RA1/CCND2/IL11/OSMR/IL12RB1/TSLP/IL20/IL3RA/SOCS1/CSF2/STAT2/AKT3/LIF/LEP/IL22RA1/IL4R/SOCS3/PIK3R5/PIK3CD/IL10/JAK3/SOCS5/STAT5A/IL12B/IFNL2/PIM1/IL26/IFNA17/PIK3R1/IFNAR2/PRL/IRF9
KEGG_CELL_ADHESION_MOLECULES_CAMS	KEGG_CELL_ADHESION_MOLECULES_CAMS	129	0.586348	2.06906	0.00179211	0.0146614	0.0110715	2255	tags=42%, list=11%, signal=38%	CD274/PDCD1LG2/CD86/HLA-DQA1/VCAM1/CD2/PTPRC/ICOS/ITGA4/CD8A/CD80/ITGB2/VCAN/HLA-DQB1/SDC2/CTLA4/ITGAL/HLA-DMB/ICAM1/HLA-DPA1/ITGAM/HLA-DRA/CD28/SELL/NRCAM/CD226/CDH3/HLA-DMA/CNTNAP2/HLA-DPB1/HLA-DRB1/ICAM3/HLA-F/CDH2/CD40/SELPLG/ITGA6/ITGB7/CLDN14/HLA-B/ITGAV/HLA-G/HLA-C/HLA-DOA/HLA-DOB/CD58/NLGN1/CD4/L1CAM/ITGB1/HLA-E/HLA-A/NLGN4X/PECAM1
KEGG_HEMATOPOIETIC_CELL_LINEAGE	KEGG_HEMATOPOIETIC_CELL_LINEAGE	84	0.744496	2.48601	0.00179211	0.0146614	0.0110715	2242	tags=54%, list=11%, signal=48%	IL1R2/IL2RA/IL1B/IL7R/CD2/CD14/ITGA4/CD8A/CD1A/CD3D/CD38/IL6/CD3G/IL7/ITGAM/HLA-DRA/IL1A/CSF2RA/ITGA5/CD44/CD1D/CR1/MME/CSF1R/CD19/HLA-DRB1/MS4A1/IL11/CD33/ITGA6/CD1B/CD37/IL1R1/ANPEP/CD3E/IL3RA/ITGA2/CSF2/TNF/CSF1/CD4/IL4R/CD7/ITGA3/CD5
KEGG_NATURAL_KILLER_CELL_MEDIATED_CYTOTOXICITY	KEGG_NATURAL_KILLER_CELL_MEDIATED_CYTOTOXICITY	128	0.643107	2.26368	0.00179533	0.0146614	0.0110715	2704	tags=40%, list=13%, signal=35%	GZMB/IFNG/FCER1G/FCGR3B/MICB/PIK3CG/LCP2/ITGB2/TYROBP/ITGAL/PRF1/ICAM1/SH2D1A/KLRD1/CD48/RAC2/HCST/LCK/KLRC3/FAS/FASLG/ULBP2/PRKCB/MICA/CD247/HLA-B/PPP3R1/HLA-G/HLA-C/CSF2/TNF/SHC4/KIR2DL4/TNFSF10/PIK3R5/FYN/PIK3CD/HLA-E/HLA-A/PPP3CC/KIR2DL2/NFATC2/VAV1/KIR3DL1/IFNA17/CD244/TNFRSF10B/PIK3R1/PLCG2/KIR2DS5/IFNAR2
KEGG_TOLL_LIKE_RECEPTOR_SIGNALING_PATHWAY	KEGG_TOLL_LIKE_RECEPTOR_SIGNALING_PATHWAY	97	0.674896	2.28634	0.00180505	0.0146614	0.0110715	517	tags=21%, list=2%, signal=20%	CXCL11/CCL4/SPP1/CXCL9/CXCL10/CXCL8/TLR8/IL1B/CD86/CD14/TLR4/CTSK/PIK3CG/CD80/CCL5/LY96/TLR1/IL6/STAT1/TLR2
KEGG_ANTIGEN_PROCESSING_AND_PRESENTATION	KEGG_ANTIGEN_PROCESSING_AND_PRESENTATION	75	0.747714	2.44709	0.00180832	0.0146614	0.0110715	2735	tags=52%, list=13%, signal=45%	HLA-DQA1/CD8A/CTSS/HLA-DQB1/HSPA6/TAP1/HLA-DMB/HLA-DPA1/KLRD1/HLA-DRA/CTSL/TAP2/HLA-DMA/KLRC3/KLRC4/HLA-DPB1/HLA-DRB1/CTSB/HLA-F/CD74/HLA-B/HLA-G/HLA-C/HLA-DOA/HLA-DOB/TAPBP/LGMN/KIR2DL4/KIR3DL3/CD4/HLA-E/HLA-A/CANX/KIR2DL2/B2M/KIR3DL1/IFNA17/KIR2DS5/PSME1
KEGG_ECM_RECEPTOR_INTERACTION	KEGG_ECM_RECEPTOR_INTERACTION	81	0.683756	2.26664	0.00181488	0.0146614	0.0110715	2194	tags=47%, list=11%, signal=42%	COL11A1/SPP1/TNC/ITGA4/COL5A2/THBS2/LAMC2/COL5A1/SDC2/COL3A1/THBS1/FN1/LAMA1/ITGA5/CD44/COL6A3/COL6A2/COL4A2/LAMB1/COL4A1/COL1A1/COL1A2/LAMB3/LAMA4/ITGA6/ITGB7/COL5A3/COL6A1/IBSP/COL4A6/ITGAV/ITGA2/ITGA11/LAMC1/ITGB1/LAMA3/SV2A/ITGA3
KEGG_T_CELL_RECEPTOR_SIGNALING_PATHWAY	KEGG_T_CELL_RECEPTOR_SIGNALING_PATHWAY	108	0.555927	1.90827	0.00182149	0.0146614	0.0110715	2645	tags=31%, list=13%, signal=28%	IFNG/ITK/PTPRC/ICOS/CD8A/PIK3CG/LCP2/CD3D/PAK5/CTLA4/CD3G/RASGRP1/LCK/CD28/NFKBIE/CD247/PPP3R1/CD3E/CSF2/TNF/AKT3/CD4/PIK3R5/FYN/PIK3CD/IL10/PRKCQ/PPP3CC/MALT1/NFATC2/CARD11/VAV1/PIK3R1/MAPK12
KEGG_LEISHMANIA_INFECTION	KEGG_LEISHMANIA_INFECTION	68	0.787368	2.52473	0.00184162	0.0146614	0.0110715	2645	tags=59%, list=13%, signal=52%	IFNG/IL1B/FCGR3B/HLA-DQA1/FCGR2C/FCGR2A/TLR4/ITGA4/NCF2/ITGB2/NCF4/HLA-DQB1/JAK2/STAT1/HLA-DMB/HLA-DPA1/ITGAM/HLA-DRA/IL1A/TLR2/NCF1/CR1/HLA-DMA/PTGS2/HLA-DPB1/HLA-DRB1/PRKCB/HLA-DOA/TGFB2/HLA-DOB/TGFB3/TNF/ITGB1/IL10/CYBA/IRAK4/IL12B/TGFB1/NOS2/MAPK12
KEGG_VIRAL_MYOCARDITIS	KEGG_VIRAL_MYOCARDITIS	66	0.668142	2.1215	0.00189036	0.0146614	0.0110715	2127	tags=44%, list=10%, signal=40%	CD86/HLA-DQA1/CD80/ITGB2/HLA-DQB1/ITGAL/HLA-DMB/PRF1/ICAM1/HLA-DPA1/HLA-DRA/RAC2/CD28/CAV1/HLA-DMA/HLA-DPB1/HLA-DRB1/HLA-F/CD40/SGCD/HLA-B/HLA-G/HLA-C/HLA-DOA/HLA-DOB/SGCB/FYN/HLA-E/HLA-A
KEGG_INTESTINAL_IMMUNE_NETWORK_FOR_IGA_PRODUCTION	KEGG_INTESTINAL_IMMUNE_NETWORK_FOR_IGA_PRODUCTION	45	0.805555	2.38968	0.00189753	0.0146614	0.0110715	1578	tags=56%, list=8%, signal=51%	TNFRSF17/CD86/HLA-DQA1/TNFSF13B/ICOS/ITGA4/CD80/IL15/HLA-DQB1/IL6/HLA-DMB/HLA-DPA1/HLA-DRA/CD28/CXCR4/IL15RA/CXCL12/HLA-DMA/HLA-DPB1/HLA-DRB1/CD40/ITGB7/TNFSF13/HLA-DOA/HLA-DOB
KEGG_CYTOSOLIC_DNA_SENSING_PATHWAY	KEGG_CYTOSOLIC_DNA_SENSING_PATHWAY	50	0.664285	2.03047	0.00190114	0.0146614	0.0110715	550	tags=16%, list=3%, signal=16%	CCL4/CXCL10/AIM2/IL1B/CCL5/IL6/CASP1/ZBP1
KEGG_SYSTEMIC_LUPUS_ERYTHEMATOSUS	KEGG_SYSTEMIC_LUPUS_ERYTHEMATOSUS	51	0.749852	2.29308	0.00191205	0.0146614	0.0110715	1991	tags=57%, list=10%, signal=52%	FCGR2B/IFNG/CD86/FCGR3B/HLA-DQA1/FCGR2C/FCGR2A/C1S/C1QB/CD80/C1QA/HLA-DQB1/C1QC/HLA-DMB/HLA-DPA1/HLA-DRA/CD28/C1R/HLA-DMA/HLA-DPB1/HLA-DRB1/C2/CD40/TRIM21/HLA-DOA/HLA-DOB/TNF/ACTN1/IL10
KEGG_AUTOIMMUNE_THYROID_DISEASE	KEGG_AUTOIMMUNE_THYROID_DISEASE	47	0.808491	2.43029	0.00191571	0.0146614	0.0110715	2127	tags=57%, list=10%, signal=52%	GZMB/CD86/HLA-DQA1/CD80/HLA-DQB1/CTLA4/HLA-DMB/PRF1/HLA-DPA1/HLA-DRA/CD28/HLA-DMA/FAS/HLA-DPB1/HLA-DRB1/FASLG/HLA-F/CD40/HLA-B/HLA-G/HLA-C/HLA-DOA/HLA-DOB/TSHR/HLA-E/IL10/HLA-A
KEGG_PRIMARY_IMMUNODEFICIENCY	KEGG_PRIMARY_IMMUNODEFICIENCY	35	0.789647	2.20619	0.0019305	0.0146614	0.0110715	2171	tags=49%, list=10%, signal=44%	IL7R/PTPRC/ICOS/CD8A/CD3D/ADA/TAP1/BTK/IL2RG/LCK/TAP2/CD79A/CD19/CD40/CD3E/CD4/JAK3
KEGG_PROTEASOME	KEGG_PROTEASOME	40	0.626439	1.79175	0.00193798	0.0146614	0.0110715	4631	tags=48%, list=22%, signal=37%	IFNG/PSMB9/PSMB8/PSMB10/PSMA2/PSMD8/PSME1/PSMC4/PSMB6/PSMD6/POMP/PSMA1/PSMB7/PSMA7/PSMC6/PSMA8/PSMD14/PSMA3/PSMD7
KEGG_TYPE_I_DIABETES_MELLITUS	KEGG_TYPE_I_DIABETES_MELLITUS	40	0.827208	2.36599	0.00193798	0.0146614	0.0110715	2127	tags=68%, list=10%, signal=61%	GZMB/IFNG/IL1B/CD86/HLA-DQA1/CD80/HLA-DQB1/HLA-DMB/PRF1/HLA-DPA1/HLA-DRA/IL1A/CD28/HLA-DMA/FAS/HLA-DPB1/HLA-DRB1/FASLG/HLA-F/HLA-B/HLA-G/HLA-C/HLA-DOA/HLA-DOB/TNF/HLA-E/HLA-A
KEGG_GRAFT_VERSUS_HOST_DISEASE	KEGG_GRAFT_VERSUS_HOST_DISEASE	36	0.856984	2.40169	0.00194175	0.0146614	0.0110715	2542	tags=86%, list=12%, signal=76%	GZMB/IFNG/IL1B/CD86/HLA-DQA1/CD80/HLA-DQB1/IL6/HLA-DMB/PRF1/HLA-DPA1/KLRD1/HLA-DRA/IL1A/CD28/HLA-DMA/FAS/HLA-DPB1/HLA-DRB1/FASLG/HLA-F/HLA-B/HLA-G/HLA-C/HLA-DOA/HLA-DOB/TNF/HLA-E/HLA-A/KIR2DL2/KIR3DL1
KEGG_ALLOGRAFT_REJECTION	KEGG_ALLOGRAFT_REJECTION	34	0.85715	2.3653	0.0019802	0.0146614	0.0110715	2127	tags=79%, list=10%, signal=71%	GZMB/IFNG/CD86/HLA-DQA1/CD80/HLA-DQB1/HLA-DMB/PRF1/HLA-DPA1/HLA-DRA/CD28/HLA-DMA/FAS/HLA-DPB1/HLA-DRB1/FASLG/HLA-F/CD40/HLA-B/HLA-G/HLA-C/HLA-DOA/HLA-DOB/TNF/HLA-E/IL10/HLA-A
KEGG_ASTHMA	KEGG_ASTHMA	27	0.847187	2.24829	0.00198413	0.0146614	0.0110715	1991	tags=59%, list=10%, signal=54%	CCL11/FCER1G/HLA-DQA1/HLA-DQB1/HLA-DMB/HLA-DPA1/HLA-DRA/HLA-DMA/HLA-DPB1/HLA-DRB1/CD40/MS4A2/HLA-DOA/HLA-DOB/TNF/IL10
KEGG_NOD_LIKE_RECEPTOR_SIGNALING_PATHWAY	KEGG_NOD_LIKE_RECEPTOR_SIGNALING_PATHWAY	61	0.750745	2.3567	0.00199203	0.0146614	0.0110715	1925	tags=39%, list=9%, signal=36%	CCL8/CCL11/CCL7/CXCL8/CCL13/IL1B/CCL5/CCL2/IL6/CASP1/CARD18/NOD2/PSTPIP1/NLRP3/RIPK2/CASP5/TNFAIP3/HSP90B1/CXCL1/BIRC3/TNF/NLRC4/NAIP/CARD8
KEGG_REGULATION_OF_ACTIN_CYTOSKELETON	KEGG_REGULATION_OF_ACTIN_CYTOSKELETON	209	0.424104	1.59939	0.0034662	0.0245301	0.0185238	4097	tags=33%, list=20%, signal=27%	CD14/ITGA4/PIK3CG/ITGB2/PDGFC/PAK5/ITGAL/ITGAM/RAC2/FN1/NCKAP1L/IQGAP2/FGF2/ITGA5/F2R/ARHGEF6/ITGAX/PDGFRA/PDGFRB/ITGA6/ITGB7/FGF11/ITGAV/GNA13/ITGA2/WASF1/CFL2/PDGFA/ITGA11/GNA12/WAS/PIK3R5/PIK3CD/MRAS/MYL9/ACTN1/ITGB1/SSH1/BDKRB1/RRAS/ITGA3/FGF7/MYLK/MSN/VAV1/ITGAE/PIK3R1/PFN1/PFN2/FGF1/DIAPH2/ITGB3/RHOA/NRAS/GSN/PDGFB/PAK1/FGF23/EGFR/ITGB4/MYLK2/MYL7/FGF5/VAV2/PIP4K2A/ITGB8/PIK3CA/MYL2/PAK2/AR…
KEGG_APOPTOSIS	KEGG_APOPTOSIS	87	0.520966	1.7474	0.00362319	0.0246914	0.0186456	2671	tags=30%, list=13%, signal=26%	IL1B/CSF2RB/PIK3CG/IL1A/IL1RAP/FAS/FASLG/IRAK3/PPP3R1/IL1R1/BIRC3/IL3RA/BAX/TNF/AKT3/TNFSF10/PIK3R5/PIK3CD/PRKAR2B/PPP3CC/IRAK2/PRKACB/IRAK4/TNFRSF10B/PIK3R1/CASP7
KEGG_GLYCOSAMINOGLYCAN_BIOSYNTHESIS_CHONDROITIN_SULFATE	KEGG_GLYCOSAMINOGLYCAN_BIOSYNTHESIS_CHONDROITIN_SULFATE	22	0.725171	1.84397	0.00403226	0.0264977	0.0200097	2540	tags=50%, list=12%, signal=44%	CHST11/CSGALNACT2/XYLT1/CHSY3/CSGALNACT1/CHST15/CHST7/CHSY1/CHPF/DSE/CHPF2
KEGG_TIGHT_JUNCTION	KEGG_TIGHT_JUNCTION	129	-0.398643	-1.46769	0.00675676	0.0415913	0.0314076	2873	tags=22%, list=14%, signal=20%	AKT1/VAPA/CLDN11/EPB41/IGSF5/PRKCE/CLDN2/PATJ/ASH1L/TJP1/MAGI1/MYH14/EXOC3/TJP2/AFDN/CLDN4/PARD3/CLDN7/EPB41L1/PRKCZ/CLDN10/PARD6B/LLGL2/MAGI3/TJP3/OCLN/CLDN3/CGN/CLDN18
KEGG_LYSOSOME	KEGG_LYSOSOME	116	0.46244	1.60963	0.00715564	0.0415913	0.0314076	3272	tags=34%, list=16%, signal=29%	CTSK/ACP5/CTSS/LAPTM5/ATP6V0D2/CTSL/CTSV/CTSZ/CTSB/LIPA/GM2A/SLC11A1/GLA/ARSB/CTSC/CTSO/GALC/AP1S2/LGMN/ACP2/CTSE/HEXB/DNASE2B/M6PR/FUCA1/MAN2B1/AP3S1/TCIRG1/PSAPL1/DNASE2/PLA2G15/CTSD/CLN5/AP1S1/AP1M1/AP3B1/GNS/AP3M2/GNPTAB
KEGG_LEUKOCYTE_TRANSENDOTHELIAL_MIGRATION	KEGG_LEUKOCYTE_TRANSENDOTHELIAL_MIGRATION	113	0.468408	1.62197	0.00720721	0.0415913	0.0314076	3062	tags=35%, list=15%, signal=30%	MMP9/VCAM1/ITK/ITGA4/PIK3CG/NCF2/ITGB2/CYBB/NCF4/RHOH/ITGAL/ICAM1/ITGAM/RAC2/NCF1/THY1/CXCR4/CXCL12/PRKCB/CLDN14/MMP2/PIK3R5/PIK3CD/MYL9/ACTN1/ITGB1/CYBA/GNAI2/PECAM1/MSN/VAV1/GNAI3/PIK3R1/PLCG2/GNAI1/MAPK12/VASP/CLDN1/RAP1B/PTPN11
KEGG_B_CELL_RECEPTOR_SIGNALING_PATHWAY	KEGG_B_CELL_RECEPTOR_SIGNALING_PATHWAY	75	0.533271	1.74527	0.00723327	0.0415913	0.0314076	2771	tags=36%, list=13%, signal=31%	FCGR2B/PIK3AP1/PIK3CG/BTK/RAC2/CD72/LILRB3/NFKBIE/CD79A/CD19/IFITM1/PRKCB/RASGRP3/PPP3R1/DAPP1/AKT3/PIK3R5/PIK3CD/PPP3CC/MALT1/NFATC2/CARD11/VAV1/PIK3R1/PLCG2/LYN/CD79B
KEGG_BLADDER_CANCER	KEGG_BLADDER_CANCER	41	0.595348	1.71394	0.00773694	0.0431393	0.0325766	1272	tags=17%, list=6%, signal=16%	MMP1/MMP9/CXCL8/VEGFC/THBS1/TYMP/MMP2
KEGG_SMALL_CELL_LUNG_CANCER	KEGG_SMALL_CELL_LUNG_CANCER	84	0.495572	1.65481	0.00896057	0.0484925	0.0366191	2608	tags=33%, list=13%, signal=29%	PIK3CG/LAMC2/FN1/LAMA1/COL4A2/LAMB1/PTGS2/COL4A1/LAMB3/LAMA4/CDK6/ITGA6/COL4A6/ITGAV/BIRC3/ITGA2/AKT3/PIK3R5/LAMC1/PIK3CD/ITGB1/TRAF1/LAMA3/ITGA3/SKP2/NOS2/TRAF3/PIK3R1
KEGG_FC_GAMMA_R_MEDIATED_PHAGOCYTOSIS	KEGG_FC_GAMMA_R_MEDIATED_PHAGOCYTOSIS	93	0.487078	1.63723	0.00924214	0.0485873	0.0366906	3529	tags=32%, list=17%, signal=27%	FCGR2B/FCGR2C/PTPRC/FCGR2A/PIK3CG/RAC2/SPHK1/NCF1/HCK/DOCK2/PRKCB/WASF1/CFL2/AKT3/WAS/PIK3R5/PIK3CD/ASAP1/VAV1/MARCKS/PIK3R1/PLCG2/LYN/VASP/FCGR1A/GSN/PAK1/LAT/DNM1/INPP5D

## Sheet: KEGG.TCGA-GTEx
ID	Description	setSize	enrichmentScore	NES	pvalue	p.adjust	qvalues	rank	leading_edge	core_enrichment
KEGG_FOLATE_BIOSYNTHESIS	KEGG_FOLATE_BIOSYNTHESIS	10	-0.968723	-1.77661	0.0015873	0.128294	0.120447	452	tags=20%, list=2%, signal=20%	ALPP/ALPG
KEGG_BASAL_TRANSCRIPTION_FACTORS	KEGG_BASAL_TRANSCRIPTION_FACTORS	34	-0.888245	-1.85692	0.00290276	0.128294	0.120447	49	tags=6%, list=0%, signal=6%	TAF7L/TAF1L
KEGG_GRAFT_VERSUS_HOST_DISEASE	KEGG_GRAFT_VERSUS_HOST_DISEASE	36	0.861134	2.0564	0.00321543	0.128294	0.120447	2249	tags=86%, list=11%, signal=77%	CD80/CD28/IFNG/FASLG/IL1B/KIR3DL1/TNF/KLRC1/CD86/KLRD1/IL2/HLA-DQA1/HLA-DMB/KIR2DL3/KIR3DL2/HLA-DOA/IL1A/GZMB/PRF1/FAS/HLA-DQB1/IL6/HLA-DPA1/HLA-DPB1/KIR2DL1/HLA-DRB5/HLA-DOB/HLA-DMA/HLA-G/HLA-DRA/HLA-DRB1
KEGG_CALCIUM_SIGNALING_PATHWAY	KEGG_CALCIUM_SIGNALING_PATHWAY	168	-0.712701	-1.61766	0.00361882	0.128294	0.120447	339	tags=4%, list=2%, signal=4%	ATP2B3/LHCGR/TACR3/MYLK3/P2RX3/ERBB4/CHRM1
KEGG_HEMATOPOIETIC_CELL_LINEAGE	KEGG_HEMATOPOIETIC_CELL_LINEAGE	81	0.767198	1.94825	0.00398406	0.128294	0.120447	2348	tags=62%, list=11%, signal=55%	IL5RA/CD1B/CSF2/CD1E/CD1C/CR1/CD33/CD1A/FCGR1A/IL9R/CD3G/IL2RA/IL1B/TNF/ITGAM/GP5/FLT3/ITGA4/IL7/IL7R/ITGB3/CSF1R/CD5/CSF2RA/IL1R2/MME/CD8B/IL1A/CD2/CD1D/CD3D/CD3E/CD4/CD14/CD8A/IL11/CD19/IL6/MS4A1/ANPEP/CD7/HLA-DRB5/CD37/CD38/ITGA1/CSF1/HLA-DRA/HLA-DRB1/CSF3R/ITGA5
KEGG_LYSOSOME	KEGG_LYSOSOME	121	0.725116	1.89392	0.00483092	0.128294	0.120447	2338	tags=14%, list=11%, signal=13%	DNASE2B/PSAPL1/ATP6V0D2/CTSG/CTSE/CTSS/CTSK/CTSW/ACP5/LAPTM5/SLC11A1/LIPA/NAPSA/CTSL/ARSB/CTSH/CTSO
KEGG_NATURAL_KILLER_CELL_MEDIATED_CYTOTOXICITY	KEGG_NATURAL_KILLER_CELL_MEDIATED_CYTOTOXICITY	115	0.716854	1.83	0.00485437	0.128294	0.120447	2860	tags=43%, list=14%, signal=38%	CSF2/PIK3CG/CD244/NCR1/IFNG/FASLG/KIR3DL1/SH2D1A/TNF/FCGR3B/NCR3/KLRC1/CD48/SH2D1B/KLRD1/KIR2DL3/ITGB2/KIR3DL2/FCGR3A/HCST/LCP2/NFATC2/ITGAL/GZMB/SHC4/PRF1/CD247/PRKCB/FAS/KLRC2/KIR2DL4/KIR2DS4/LCK/FCER1G/PIK3R5/KLRC3/ICAM2/ICAM1/TYROBP/KIR2DL1/HLA-G/MICB/RAC2/TNFRSF10C/ULBP2/VAV1/ZAP70/SYK/IFNAR2/ULBP3
KEGG_CYTOKINE_CYTOKINE_RECEPTOR_INTERACTION	KEGG_CYTOKINE_CYTOKINE_RECEPTOR_INTERACTION	232	0.703559	1.93585	0.00609756	0.141006	0.132381	2900	tags=56%, list=14%, signal=49%	CX3CR1/IL5RA/CSF2/CCL24/IL26/CCL7/PPBP/CXCL5/IL10/CCR2/CCL23/CCR8/TNFRSF9/CCL13/CCL3/CCL8/CCR4/IL9R/CXCL11/CCL3L1/IFNG/TNFRSF17/FASLG/CCR1/IL2RA/TNFSF8/IL1B/TNF/IL21R/CXCR6/CXCR3/CCR5/IL12B/CCR6/CD40LG/IL12RB1/CCL4L2/CXCR5/OSM/CXCL10/INHBA/IL23R/TNFSF13B/CCL4/FLT3/CCL11/TNFRSF8/IL7/CCL18/CXCL9/CCL19/IL2/IL7R/CCL22/LTA/CSF2RB/CCL2/PRLR/TNFSF4/CXCL13/CSF1R/CSF2RA/CCL17/IL1R2/IL12RB2/IL10RA/XCR1/IL2…
KEGG_LEISHMANIA_INFECTION	KEGG_LEISHMANIA_INFECTION	68	0.75327	1.91038	0.00766283	0.157514	0.147879	2249	tags=50%, list=11%, signal=45%	IL10/CR1/FCGR1A/IFNG/IL1B/TLR4/TNF/FCGR3B/IL12B/ITGAM/ITGA4/FCGR2A/HLA-DQA1/NCF1/HLA-DMB/ITGB2/FCGR3A/HLA-DOA/IL1A/PRKCB/TGFB3/HLA-DQB1/HLA-DPA1/NCF4/NCF2/TLR2/HLA-DPB1/HLA-DRB5/HLA-DOB/JAK2/HLA-DMA/TGFB2/HLA-DRA/HLA-DRB1
KEGG_T_CELL_RECEPTOR_SIGNALING_PATHWAY	KEGG_T_CELL_RECEPTOR_SIGNALING_PATHWAY	107	0.684234	1.77258	0.00938967	0.173709	0.163084	1563	tags=25%, list=7%, signal=23%	CSF2/IL10/PIK3CG/ICOS/CD28/IFNG/CD3G/TNF/CD40LG/ITK/IL2/CTLA4/PAK3/PTPRC/LCP2/CD8B/NFATC2/CD3D/CD247/CD3E/PDCD1/GRAP2/PRKCQ/CD4/CD8A/LCK/PIK3R5
